# Supplementary material for: Insights into non-thermal plasma chemistry of acetone diluted in N2/O2 mixtures: a real-time MS experiment
Source: Royal Society of Chemistry journal article supplement (doi:10.1039/d2cp02119f), 2022-01-01
Supplement: d2cp02119f1.pdf [file d2cp02119f1.pdf]

# Insights into non-thermal plasma chemistry of acetone diluted in N<sub>2</sub>/O<sub>2</sub> mixtures: a real-time MS experiment

*Sébastien Thomas<sup>a</sup>, Nicole Blin-Simiand<sup>b</sup>, Michel Héninger<sup>a</sup>, Pascal Jeanney<sup>b</sup>, Joel Lemaire<sup>a</sup>,  
Lionel Magne<sup>b</sup>, Hélène Mestdagh<sup>a</sup>, Stéphane Pasquiers<sup>b</sup>, Essyllt Louarn<sup>\*a,c†</sup>*

a- Université Paris-Saclay, CNRS, Institut de Chimie Physique, UMR8000, 91405 Orsay,  
France

b- Université Paris-Saclay, CNRS, Laboratoire de Physique des Gaz et des Plasma,  
UMR8578, 91405 Orsay, France

c- Université Claude Bernard Lyon 1, CNRS, Institut de Recherche sur la Catalyse et  
l'Environnement de Lyon, UMR5256, 69626 Villeurbanne, FRANCE

## TABLE OF CONTENTS

|                                                                                                                                                                                                                                                                        |           |
|------------------------------------------------------------------------------------------------------------------------------------------------------------------------------------------------------------------------------------------------------------------------|-----------|
| <b>Table S1.</b> Kinetic reactions cited in the text are summarized in this table. Index represent the reaction number in the text.....                                                                                                                                | <b>3</b>  |
| <b>Table S2.</b> Proton transfer from $\text{H}_3\text{O}^+$ kinetic parameters used for the identified molecules. Polarizability (in $10^{-24} \text{ cm}^3$ ), dipole moment (in D) and proton affinity (PA) (in $\text{kJ mol}^{-1}$ ) are from NIST database. .... | <b>7</b>  |
| <b>Table S3.</b> List of observed ions (except precursor ions and isotopes) after 620 discharges for 500 ppm of acetone in a $\text{N}_2/\text{O}_2$ mix with various oxygen content. ....                                                                             | <b>9</b>  |
| <b>Figure S1.</b> Ion fragments for HONO (a and c) and $\text{CH}_3\text{NO}_3$ (b and d) protonation.....                                                                                                                                                             | <b>11</b> |
| <b>Figure S2.</b> Evolution of the averaged concentrations of the sum of ketene and acetaldehyde compared to acetone concentration. ....                                                                                                                               | <b>12</b> |
| <b>Annex 1.</b> Main kinetic processes involved in the production of formaldehyde ( $\text{CH}_2\text{O}$ ) and methanol ( $\text{CH}_3\text{OH}$ ) specific to mixtures containing oxygen. ....                                                                       | <b>13</b> |
| <b>References</b> .....                                                                                                                                                                                                                                                | <b>16</b> |

**Table S1.** Kinetic reactions cited in the text are summarized in this table. Index represent the reaction number in the text. Rate coefficient  $k$  of the reactions are at 298 K or otherwise stated. Kinetic data are taken from NIST kinetic database<sup>1</sup> when available, from plasma chemistry published reactivity, or from JPL database<sup>2</sup> otherwise. The order of the reaction is generally bimolecular (noted 2) or termolecular (noted 3). In that case reaction rates are calculated for a pressure of 0.46 bar.

| Index                            | Reaction                                                                                                    | rate $k$<br>( $\text{cm}^3 \text{s}^{-1}$ or $\text{cm}^6 \text{s}^{-1}$ )               | ord. | Ref. |
|----------------------------------|-------------------------------------------------------------------------------------------------------------|------------------------------------------------------------------------------------------|------|------|
| <i>Plasma initial reactions</i>  |                                                                                                             |                                                                                          |      |      |
| 3                                | $\text{N}_2^* + \text{O}_2 \rightarrow 2 \text{O} + \text{N}_2$                                             | Function of the nitrogen excited state<br>[ $2 \times 10^{-12}$ to $3 \times 10^{-10}$ ] | 2    | 3,4  |
|                                  | $\text{O}(^1\text{D}) + \text{N}_2 \rightarrow \text{O}(^3\text{P}) + \text{N}_2$                           | $2.6 \times 10^{-11}$                                                                    | 2    | 3    |
|                                  | $\text{O}(^1\text{D}) + \text{O}_2 \rightarrow \text{O}(^3\text{P}) + \text{O}_2$                           | $4.0 \times 10^{-11}$                                                                    | 2    | 2    |
| 6                                | $\text{N}_2^* + \text{O} \rightarrow \text{NO} + \text{N}$                                                  | $7.0 \times 10^{-12}$                                                                    | 2    | 3,4  |
| 7                                | $\text{N} + \text{O} \rightarrow \text{NO}$                                                                 | $1.02 \times 10^{-32}$                                                                   | 3    | 3,4  |
| 8                                | $\text{O} + \text{O}_2 \rightarrow \text{O}_3$                                                              | $6.1 \times 10^{-34}$                                                                    | 3    | 2–4  |
|                                  | $\text{O} + \text{NO} \rightarrow \text{NO}_2$                                                              | $9.1 \times 10^{-32}$                                                                    | 3    | 2    |
| 26                               | $\text{H} + \text{O} \rightarrow \text{OH}$                                                                 | $7.7 \times 10^{-31}$                                                                    | 3    | 5    |
| S18                              | $\text{H} + \text{O}_2 \rightarrow \text{HO}_2$                                                             | $5.3 \times 10^{-32}$                                                                    | 3    | 2    |
| <i>VOC degradation reactions</i> |                                                                                                             |                                                                                          |      |      |
| 9                                | $\text{N}_2^* + \text{CH}_3\text{COCH}_3 \rightarrow \text{products}$                                       | $\sim 5.5 \times 10^{-11}$                                                               | 2    | 6,7  |
| 9a                               | $\text{N}_2^* + \text{CH}_3\text{COCH}_3 \rightarrow \text{CH}_3^* + \text{CH}_3\text{CO}^* + \text{N}_2$ † |                                                                                          | 2    |      |
| 9b                               | $\text{N}_2^* + \text{CH}_3\text{COCH}_3 \rightarrow \text{H}^* + \text{CH}_2\text{COCH}_3 + \text{N}_2$    |                                                                                          | 2    |      |
| 22                               | $\text{N}_2^* + \text{HCN} \rightarrow \text{H} + \text{CN} + \text{N}_2$                                   | $4.4 \times 10^{-12}$                                                                    | 2    | 7    |
| 23                               | $\text{N}_2^* + \text{CH}_3\text{CN} \rightarrow \text{products}$                                           |                                                                                          | 2    | 7    |
| 23a                              | $\text{N}_2^* + \text{CH}_3\text{CN} \rightarrow \text{CH}_3 + \text{CN} + \text{N}_2$                      | $3.9 \times 10^{-12}$                                                                    | 2    |      |
| 23b                              | $\text{N}_2^* + \text{CH}_3\text{CN} \rightarrow \text{H} + \text{CH}_2\text{CN}$                           | $9.1 \times 10^{-12}$                                                                    | 2    |      |
| 27                               | $\text{N}_2^* + \text{CH}_2\text{O} \rightarrow \text{products} + \text{N}_2$                               | $5.0 \times 10^{-10}$                                                                    | 2    | 6    |
| S25                              | $\text{N}_2^* + \text{CH}_2\text{O} \rightarrow \text{H} + \text{HCO} + \text{N}_2$                         | $2.5 \times 10^{-10}$                                                                    |      |      |
| 35                               | $\text{N}_2^* + \text{CH}_2\text{CO} \rightarrow \text{products} + \text{N}_2$                              | $6.5 \times 10^{-10}$                                                                    | 2    | 7    |
| 36                               | $\text{N}_2^* + \text{CH}_3\text{CHO} \rightarrow \text{products} + \text{N}_2$                             | $4.2 \times 10^{-11}$                                                                    | 2    | 8    |
| 11                               | $\text{O} + \text{CH}_3\text{COCH}_3 \rightarrow \text{CH}_3\text{COCH}_2 + \text{OH}^*$                    | $7.5 \times 10^{-16}$                                                                    | 2    | 1,9  |

\* Predominant reaction pathway

|                               |                                                                                                                                                                                  |                                     |   |         |
|-------------------------------|----------------------------------------------------------------------------------------------------------------------------------------------------------------------------------|-------------------------------------|---|---------|
|                               | O + HCN → products<br>O + HCN → NCO + H                                                                                                                                          | $1.5 \times 10^{-17}$               | 2 | 2       |
|                               | O + CH <sub>3</sub> CN → products                                                                                                                                                | $3.1 \times 10^{-15}$ [321 K]       | 2 | 10      |
|                               | O + C <sub>2</sub> H <sub>5</sub> CN → products                                                                                                                                  | $1.0 \times 10^{-14}$ [354 K]       | 2 | 10      |
| 4                             | O + C <sub>2</sub> H <sub>6</sub> → OH + C <sub>2</sub> H <sub>5</sub>                                                                                                           | $3.9 \times 10^{-18}$               | 2 | 1       |
| S26                           | O + CH <sub>2</sub> O → products<br>O + CH <sub>2</sub> O → OH + HCO                                                                                                             | $1.6 \times 10^{-13}$               | 2 | 2       |
| 33/S28<br>S2                  | O + CH <sub>2</sub> CO → products<br>O + CH <sub>2</sub> CO → HCO + HCO<br>O + CH <sub>2</sub> CO → CH <sub>2</sub> O + CO                                                       | $3.8 \times 10^{-13}$               | 2 | 1       |
| 33                            | O + CH <sub>3</sub> CHO → OH + CH <sub>3</sub> CO                                                                                                                                | $4.5 \times 10^{-13}$               | 2 | 2       |
|                               | O + HONO → OH + NO <sub>2</sub>                                                                                                                                                  | $9.1 \times 10^{-16}$               | 2 | 11      |
|                               | OH + CH <sub>3</sub> COCH <sub>3</sub> → products<br>OH + CH <sub>3</sub> COCH <sub>3</sub> → CH <sub>3</sub> COCH <sub>2</sub> + H <sub>2</sub> O †                             | $2.2 \times 10^{-13}$               | 2 | 1<br>2  |
|                               | OH + HCN → products                                                                                                                                                              | $3.1 \times 10^{-14}$               | 2 | 2       |
|                               | OH + CH <sub>3</sub> CN → products                                                                                                                                               | $2.3 \times 10^{-14}$               | 2 | 2       |
|                               | OH + C <sub>2</sub> H <sub>5</sub> CN → products                                                                                                                                 | $1.8 \times 10^{-14}$               | 2 | 12      |
| 5                             | OH + C <sub>2</sub> H <sub>6</sub> → H <sub>2</sub> O + C <sub>2</sub> H <sub>5</sub>                                                                                            | $2.5 \times 10^{-13}$               | 2 | 1,2     |
| S27                           | OH + CH <sub>2</sub> O → H <sub>2</sub> O + HCO †                                                                                                                                | $1.0 \times 10^{-11}$               | 2 | 1       |
|                               | OH + CH <sub>3</sub> OH → products                                                                                                                                               | $9.1 \times 10^{-13}$               | 2 | 2       |
| 34/S4/S2<br>9                 | OH + CH <sub>2</sub> CO → products<br>OH + CH <sub>2</sub> CO → HCO + CH <sub>2</sub> O<br>OH + CH <sub>2</sub> CO → CO + CH <sub>2</sub> OH                                     | $1.7 \times 10^{-11}$<br>50%<br>50% | 2 | 1       |
| 34                            | OH + CH <sub>3</sub> CHO → H <sub>2</sub> O + CH <sub>3</sub> CO                                                                                                                 | $1.6 \times 10^{-11}$ †             | 2 | 1,2     |
|                               | OH + CH <sub>3</sub> ONO <sub>2</sub> → products                                                                                                                                 | $2.8 \times 10^{-14}$               | 2 | 2       |
| <b>Intermediate reactions</b> |                                                                                                                                                                                  |                                     |   |         |
| 21                            | N + CH <sub>2</sub> → CN + H <sub>2</sub>                                                                                                                                        | $1.6 \times 10^{-11}$               | 2 | 14–16   |
| 12a<br>12b                    | N + CH <sub>3</sub> → products<br>N + CH <sub>3</sub> → HCN + H <sub>2</sub><br>N + CH <sub>3</sub> → H <sub>2</sub> CN + H †                                                    | $9.5 \times 10^{-11}$               | 2 | 1,17,18 |
| 18                            | N + C <sub>2</sub> H <sub>3</sub> → products<br>N + C <sub>2</sub> H <sub>3</sub> → CH <sub>3</sub> CN<br>N + C <sub>2</sub> H <sub>3</sub> → C <sub>2</sub> H <sub>2</sub> + NH | $7.7 \times 10^{-11}$<br>4%<br>16%  | 2 | 19      |
| 13                            | N + H <sub>2</sub> CN → HCN + NH                                                                                                                                                 | $\sim 5 \times 10^{-11}$            | 2 | 1       |
| 17                            | N + HCO → HCN + O                                                                                                                                                                | $5.8 \times 10^{-12}$               | 2 |         |

† predominant reaction pathway with a yield of  $93 \pm 18\%$ <sup>13</sup>

|              |                                                                                                                                                                                                                            |                                                |        |          |
|--------------|----------------------------------------------------------------------------------------------------------------------------------------------------------------------------------------------------------------------------|------------------------------------------------|--------|----------|
| 14           | $\text{H} + \text{H}_2\text{CN} \rightarrow \text{HCN} + \text{H}_2$                                                                                                                                                       | $5 \times 10^{-10}$                            | 2      | 17,18    |
| 16/S24<br>29 | $\text{H} + \text{CH}_3\text{CO} \rightarrow \text{products}$<br>$\text{H} + \text{CH}_3\text{CO} \rightarrow \text{CH}_3 + \text{HCO}$<br>$\text{H} + \text{CH}_3\text{CO} \rightarrow \text{CH}_2\text{CO} + \text{H}_2$ | $5.5 \times 10^{-11}$<br>65%<br>35%            | 2      | 1        |
| S9           | $\text{H} + \text{CH}_3\text{O}_2 \rightarrow \text{OH} + \text{CH}_3\text{O}$                                                                                                                                             | $1.6 \times 10^{-10}$                          | 2      | 1        |
| S1           | $\text{O} + \text{CH}_3 \rightarrow \text{CH}_2\text{O} + \text{H}^\dagger$                                                                                                                                                | $1.4 \times 10^{-10}$                          | 2      | 1        |
| 30/S3        | $\text{O} + \text{CH}_3\text{CO} \rightarrow \text{CH}_2\text{CO} + \text{OH}$                                                                                                                                             | $6.4 \times 10^{-11}$                          | 2      |          |
| S11          | $\text{O} + \text{CH}_3\text{O}_2 \rightarrow \text{CH}_3\text{O} + \text{O}_2$                                                                                                                                            | $6.0 \times 10^{-11}$                          | 2      | 1        |
| S5           | $\text{O}_2 + \text{CH}_3 \rightarrow \text{CH}_3\text{O}_2$                                                                                                                                                               | $4.3 \times 10^{-31}$                          | 3      | 1,2      |
| 47           | $\text{O}_2 + \text{CN} \rightarrow \text{NCO} + \text{O}$                                                                                                                                                                 | $2.4 \times 10^{-11}$                          | 2      | 1,20     |
|              | $\text{O}_2 + \text{HCO} \rightarrow \text{CO} + \text{HO}_2$                                                                                                                                                              | $5.2 \times 10^{-12}$                          | 2      | 2        |
| S7           | $\text{O}_2 + \text{CH}_3\text{CO} \rightarrow \text{CH}_3\text{C(O)O}_2$                                                                                                                                                  | $5.0 \times 10^{-12}$                          | 2      | 1        |
| 48           | $\text{OH} + \text{CN} \rightarrow \text{NCO} + \text{H}^\cdot$                                                                                                                                                            | $7.0 \times 10^{-11}$                          | 2      | 1        |
| 25/S19       | $\text{OH} + \text{CH}_3 \rightarrow \text{CH}_3\text{OH}$                                                                                                                                                                 | $9.5 \times 10^{-30}$                          | 3      | 1        |
| 39           | $\text{OH} + \text{NO} \rightarrow \text{HONO}$                                                                                                                                                                            | $7.1 \times 10^{-32}$                          | 3      | 2        |
| S20          | $\text{OH} + \text{CH}_3\text{O}_2 \rightarrow \text{CH}_3\text{OH} + \text{O}_2$                                                                                                                                          | $1 \times 10^{-10}$                            | 2      | 1        |
| 40           | $\text{HO}_2 + \text{NO} \rightarrow \text{HNO}_3$                                                                                                                                                                         | $1.5 \times 10^{-31}$                          | 3      |          |
| S17          | $\text{HO}_2 + \text{CH}_3\text{O} \rightarrow \text{CH}_2\text{O} + \text{H}_2\text{O}_2$                                                                                                                                 | $5.0 \times 10^{-13}$                          | 2      | 1        |
| S21          | $\text{HO}_2 + \text{CH}_3\text{O} \rightarrow \text{CH}_3\text{OH} + \text{O}_2$                                                                                                                                          | $1.8 \times 10^{-11}$                          | 2      | 1        |
| 44           | $\text{NO} + \text{CH}_3 \rightarrow \text{CH}_3\text{NO}$                                                                                                                                                                 | $4.0 \times 10^{-11}$                          | 3      | 1        |
| 42           | $\text{NO} + \text{CH}_3\text{O} \rightarrow \text{CH}_3\text{ONO}$                                                                                                                                                        | $2.3 \times 10^{-29}$                          | 3      | 1,2      |
| 43           | $\text{NO} + \text{CH}_2=\text{C(O)CH}_3 \rightarrow \text{C}_3\text{H}_5\text{ONO}$                                                                                                                                       | $3.1 \times 10^{-11}$                          | 2      | 21       |
| 41a          | $\text{NO}_2 + \text{CH}_3 \rightarrow \text{CH}_3\text{NO}_2$                                                                                                                                                             | $3.4 \times 10^{-11}$                          | 3      | 1        |
| 41b          | $\text{NO}_2 + \text{CH}_3 \rightarrow \text{CH}_3\text{ONO}$                                                                                                                                                              | $\sim 10^{-13}$                                | 3      | 1        |
|              | $\text{NO}_2 + \text{CH}_3 \rightarrow \text{CH}_3\text{O} + \text{NO}$                                                                                                                                                    | $2.3 \times 10^{-11}$                          | 2      | 22       |
| 45           | $\text{NO}_2 + \text{CH}_3\text{O} \rightarrow \text{CH}_2\text{O} + \text{HONO}$<br>$\text{NO}_2 + \text{CH}_3\text{O} \rightarrow \text{CH}_3\text{ONO}_2$                                                               | $2.0 \times 10^{-13}$<br>$5.5 \times 10^{-29}$ | 2<br>3 | 2<br>1,2 |
| 19           | $\text{CN} + \text{CH}_3\text{CN} \rightarrow \text{HCN} + \text{CH}_2\text{CN}$                                                                                                                                           | $1.2 \times 10^{-12}$                          | 2      | 1        |
| 15           | $\text{H}_2\text{CN} + \text{H}_2\text{CN} \rightarrow \text{HCN} + \text{CH}_2\text{NH}$                                                                                                                                  | $3.85 \times 10^{-12}$                         | 2      | 1        |
| 20           | $\text{CH}_3 + \text{CH}_2\text{CN} \rightarrow \text{C}_2\text{H}_5\text{CN}$                                                                                                                                             | unknown                                        | 2      | 15       |
| 46           | $\text{CH}_3 + \text{NCO} \rightarrow \text{products}$<br>$\text{CH}_3 + \text{NCO} \rightarrow \text{CH}_3\text{NCO}^\dagger$                                                                                             | $(2.1 \pm 0.8) \times 10^{-10}$<br>Dominant    | 2      | 23       |
| 31           | $\text{CH}_3 + \text{HCO} \rightarrow \text{products}$<br>$\text{CH}_3 + \text{HCO} \rightarrow \text{CH}_3\text{CHO}$<br>$\text{CH}_3 + \text{HCO} \rightarrow \text{CH}_4 + \text{CO}$                                   | $2.3 \times 10^{-10}$<br>13%<br>12%            | 2      | 1        |
| S14          | $\text{CH}_3 + \text{CH}_3\text{O} \rightarrow \text{CH}_2\text{O} + \text{CH}_4$                                                                                                                                          | $4.0 \times 10^{-11}$                          | 2      | 1        |

|         |                                                                                                                                                                                                                                                                                                                                                                                     |                              |   |    |
|---------|-------------------------------------------------------------------------------------------------------------------------------------------------------------------------------------------------------------------------------------------------------------------------------------------------------------------------------------------------------------------------------------|------------------------------|---|----|
| S10     | $\text{CH}_3 + \text{CH}_3\text{O}_2 \rightarrow \text{CH}_3\text{O} + \text{CH}_3\text{O}$                                                                                                                                                                                                                                                                                         | $4.0 \times 10^{-11}$        | 2 | 1  |
| 38      | $\text{CH}_3 + \text{COOCH}_3 \rightarrow \text{CH}_3\text{C}(\text{O})\text{OCH}_3$                                                                                                                                                                                                                                                                                                | $5.0 \times 10^{-11}$        | 2 | 24 |
| 45      | $\text{HCO} + \text{NCO} \rightarrow \text{HNCO} + \text{CO}$                                                                                                                                                                                                                                                                                                                       | $6.0 \times 10^{-11}$        | 2 | 1  |
| 24      | $\text{HCO} + \text{HCO} \rightarrow \text{CH}_2\text{O} + \text{CO}$                                                                                                                                                                                                                                                                                                               | $5.0 \times 10^{-11}$        | 2 | 1  |
| S22     | $\text{HCO} + \text{CH}_3\text{O} \rightarrow \text{CH}_3\text{OH} + \text{CO}$                                                                                                                                                                                                                                                                                                     | $1.5 \times 10^{-10}$        |   | 1  |
| 32      | $\text{HCO} + \text{CH}_3\text{CO} \rightarrow \text{CO} + \text{CH}_3\text{CHO}$                                                                                                                                                                                                                                                                                                   | $1.5 \times 10^{-11}$        |   | 1  |
| 37      | $\text{CH}_2\text{OH} + \text{CH}_3\text{CO} \rightarrow \text{CH}_3\text{C}(\text{O})\text{CH}_2\text{OH}$                                                                                                                                                                                                                                                                         |                              |   | 25 |
| S15     | $\text{CH}_3\text{O} + \text{CH}_3\text{O} \rightarrow \text{CH}_2\text{O} + \text{CH}_3\text{OH}$                                                                                                                                                                                                                                                                                  | $1.0 \times 10^{-10}$        |   | 1  |
| 28a/S16 | $\text{CH}_3\text{O} + \text{CH}_3\text{CO} \rightarrow \text{CH}_2\text{O} + \text{CH}_3\text{CHO}$                                                                                                                                                                                                                                                                                | $1.0 \times 10^{-11}$        |   | 1  |
| 28b/S23 | $\text{CH}_3\text{O} + \text{CH}_3\text{CO} \rightarrow \text{CH}_3\text{OH} + \text{CH}_2\text{CO}$                                                                                                                                                                                                                                                                                | $1.0 \times 10^{-11}$        |   | 1  |
| S6      | $\text{CH}_3\text{O}_2 + \text{CH}_3\text{O}_2 \rightarrow \text{CH}_2\text{O} + \text{CH}_3\text{OH} + \text{O}_2$                                                                                                                                                                                                                                                                 | $1.25 \times 10^{-13}$       |   | 1  |
| S12     | $\text{CH}_3\text{O}_2 + \text{CH}_3\text{O}_2 \rightarrow \text{CH}_3\text{O} + \text{CH}_3\text{O} + \text{O}_2$                                                                                                                                                                                                                                                                  | $1.25 \times 10^{-13}$       |   | 1  |
| S13     | $\text{CH}_3\text{O}_2 + \text{CH}_3\text{CO} \rightarrow \text{CH}_3 + \text{CH}_3\text{O} + \text{CO}_2$                                                                                                                                                                                                                                                                          | $4.0 \times 10^{-11}$        |   | 1  |
| S8      | $\text{CH}_3\text{O}_2 + \text{CH}_3\text{C}(\text{O})\text{O}_2 \rightarrow \text{products}$<br>$\text{CH}_3\text{O}_2 + \text{CH}_3\text{C}(\text{O})\text{O}_2 \rightarrow \text{CH}_2\text{O} + \text{CH}_3\text{COOH} + \text{O}_2$<br>$\text{CH}_3\text{O}_2 + \text{CH}_3\text{C}(\text{O})\text{O}_2 \rightarrow \text{CH}_3\text{O} + \text{CH}_3\text{CO}_2 + \text{O}_2$ | $1.8 \times 10^{-12}$<br>50% |   | 1  |

**Table S2.** Kinetic parameters of proton transfer from  $\text{H}_3\text{O}^+$  used for the identified molecules. Polarizability (in  $10^{-24} \text{ cm}^3$ ), dipole moment (in D) and proton affinity (PA) (in  $\text{kJ mol}^{-1}$ ) are from NIST database<sup>26</sup>. The kinetic rate coefficient  $k_M$  is obtained from the literature (see last column for references) and is given in  $10^{-9} \text{ cm}^3 \text{ s}^{-1}$ . The capture rate coefficient  $k_C$  is calculated knowing the polarizability and the dipole moment according to Su and Chesnavich<sup>27</sup>. Branching ratios are obtained from the references or otherwise stated.

| Name             | Formula                        | Polaris ability <sup>#</sup> | Dipole moment      | PA  | Ions                                                   | branching ratio            | $k_M$ [ $k_C$ ] | Ref $k_M$ |
|------------------|--------------------------------|------------------------------|--------------------|-----|--------------------------------------------------------|----------------------------|-----------------|-----------|
| acetone          | $\text{C}_3\text{H}_6\text{O}$ | 6.270                        | 2.88               | 812 | $\text{C}_3\text{H}_7\text{O}^+$                       | 100%                       | 3.9[3.9]        | 28,29     |
| hydrogen cyanide | $\text{HCN}$                   | 2.593                        | 2.98               | 713 | $\text{CH}_2\text{N}^+$                                | 100%                       | 3.5[4.2]        | 30,31     |
| acetonitrile     | $\text{CH}_3\text{CN}$         | 4.280                        | 3.92               | 779 | $\text{C}_2\text{H}_4\text{N}^+$                       | 100%                       | 4.9[5.1]        | 30,31     |
| methanol         | $\text{CH}_3\text{OH}$         | 3.210                        | 1.7                | 754 | $\text{CH}_5\text{O}^+$                                | 100%                       | 2.7[2.7]        | 32        |
| formaldehyde     | $\text{CH}_2\text{O}$          | 2.770                        | 2.33               | 713 | $\text{CH}_3\text{O}^+$                                | 100%                       | 3.4[3.4]        | 29,33     |
| acetaldehyde     | $\text{C}_2\text{H}_4\text{O}$ | 4.278                        | 2.69               | 768 | $\text{C}_2\text{H}_5\text{O}^+$                       | 100%                       | 3.6[3.7]        | 28,29     |
| ketene           | $\text{C}_2\text{H}_2\text{O}$ | 4.4                          | 1.42               | 825 | $\text{C}_2\text{H}_3\text{O}^+$                       | 100%                       | 2.0[2.4]        | 33        |
| nitrous acid     | $\text{HONO}$                  |                              |                    |     | $\text{H}_2\text{NO}_2^+$<br>$\text{NO}^+$             | <b>63% *</b><br><b>37%</b> | [2.6]           | 34,35     |
| methyl nitrite   | $\text{CH}_3\text{ONO}$        | 4.51                         | 2.05               | 799 |                                                        |                            | [2.9]           |           |
| nitromethane     | $\text{CH}_3\text{NO}_2$       | 4.80                         | 3.46 <sup>36</sup> | 755 | $\text{CH}_4\text{NO}_2^+$                             | 100%                       | 4.1 [4.4]       | 33        |
| nitric acid      | $\text{HNO}_3$                 |                              |                    | 751 | $\text{H}_2\text{NO}_3^+$                              | 100%                       | 1.6 [2.4]       | 37        |
| methyl nitrate   | $\text{CH}_3\text{ONO}_2$      | 5.5                          | 3.081              |     | $\text{CH}_4\text{NO}_3^+$<br>$\text{CH}_3\text{OH}^+$ | <b>76% *</b><br><b>24%</b> | [3.9]           |           |
| Isocyanic acid   | $\text{HNCO}$                  | 3.2                          | 2.16 <sup>38</sup> | 753 | $\text{CH}_2\text{NO}^+$                               | 100%                       | [2.9]           |           |

|                      |                     |      |                    |     |                                               |      |       |  |
|----------------------|---------------------|------|--------------------|-----|-----------------------------------------------|------|-------|--|
| methyl<br>isocyanate | CH <sub>3</sub> NCO | 4.97 | 3.03 <sup>38</sup> | 764 | C <sub>2</sub> H <sub>4</sub> NO <sup>+</sup> | 100% | [3.9] |  |
|----------------------|---------------------|------|--------------------|-----|-----------------------------------------------|------|-------|--|

# calculated from Miller and Savchik<sup>39</sup>

\* from this study



**Table S3.** List of observed ions (except precursor ions and isotopes) after 620 discharges for 500 ppm of acetone in a N<sub>2</sub>/O<sub>2</sub> mix with various oxygen content. Species present all for at least one oxygen content concentration above 0.05%.

| Ion                                             | Neutral species                                                         | exact mass of the ion (Da) | measured mass (Da)* | delta mass $\delta m$ (mDa) | relative signal (in %) for different O <sub>2</sub> amount |             |             |             |              |
|-------------------------------------------------|-------------------------------------------------------------------------|----------------------------|---------------------|-----------------------------|------------------------------------------------------------|-------------|-------------|-------------|--------------|
|                                                 |                                                                         |                            |                     |                             | 0%                                                         | 1%          | 2%          | 3%          | 5%           |
| CHN.H <sup>+</sup>                              | HCN                                                                     | 28.0182                    | 28.0241             | 5.9                         | <b>6.08</b>                                                | 2.94        | 2.09        | 1.45        | 1.00         |
| NO <sup>+</sup>                                 | fragment HONO                                                           | 29.9980                    | 30.0030             | 5.0                         | n.d. <sup>#</sup>                                          | 0.24        | 0.34        | 0.38        | <b>0.45</b>  |
| CH <sub>2</sub> O.H <sup>+</sup>                | CH <sub>2</sub> O                                                       | 31.0178                    | 31.0228             | 5.0                         | 0.11                                                       | 1.12        | 1.46        | <b>1.75</b> | 1.69         |
| CH <sub>4</sub> O.H <sup>+</sup>                | CH <sub>3</sub> OH                                                      | 33.0335                    | 33.0399             | 6.4                         | 0.05                                                       | <b>0.19</b> | 0.18        | 0.17        | 0.13         |
| C <sub>3</sub> H <sub>4</sub> .H <sup>+</sup>   | fragment C <sub>3</sub> H <sub>6</sub> or C <sub>3</sub> H <sub>4</sub> | 41.0386                    | 41.0422             | 3.6                         | 0.01                                                       | 0.08        | 0.09        | 0.10        | <b>0.11</b>  |
| C <sub>2</sub> H <sub>3</sub> N.H <sup>+</sup>  | H <sub>3</sub> CCN                                                      | 42.0338                    | 42.0400             | 6.2                         | <b>1.10</b>                                                | 0.64        | 0.50        | 0.37        | 0.27         |
| C <sub>2</sub> H <sub>2</sub> O.H <sup>+</sup>  | CH <sub>2</sub> CO                                                      | 43.0178                    | 43.0211             | 3.3                         | 0.02                                                       | 0.09        | 0.11        | <b>0.12</b> | <b>0.12</b>  |
| CHNO.H <sup>+</sup>                             | HNCO                                                                    | 44.0131                    | 44.0169             | 3.8                         | 0.04                                                       | <b>0.17</b> | 0.14        | 0.12        | 0.08         |
| C <sub>2</sub> H <sub>4</sub> O.H <sup>+</sup>  | CH <sub>2</sub> CHO                                                     | 45.0335                    | 45.0372             | 3.7                         | 0.07                                                       | <b>0.13</b> | <b>0.13</b> | <b>0.13</b> | 0.12         |
| CH <sub>2</sub> O <sub>2</sub> .H <sup>+</sup>  | HCOOH                                                                   | 47.0128                    | 47.0154             | 2.6                         | 0.02                                                       | 0.05        | <b>0.06</b> | <b>0.06</b> | <b>0.06</b>  |
| HNO <sub>2</sub> .H <sup>+</sup>                | HONO                                                                    | 48.0080                    | 48.0101             | 2.1                         | 0.01                                                       | 0.35        | 0.53        | 0.60        | <b>0.72</b>  |
| C <sub>3</sub> H <sub>5</sub> N.H <sup>+</sup>  | CH <sub>3</sub> CH <sub>2</sub> CN                                      | 56.0495                    | 56.0515             | 2.0                         | <b>0.17</b>                                                | 0.10        | 0.08        | 0.07        | 0.04         |
| C <sub>2</sub> H <sub>3</sub> NO.H <sup>+</sup> | CH <sub>2</sub> CHNO                                                    | 58.0287                    | 58.0273             | -1.4                        | 0.04                                                       | <b>0.06</b> | 0.05        | 0.04        | 0.02         |
| C <sub>3</sub> H <sub>6</sub> O.H <sup>+</sup>  | acetone                                                                 | 59.0491                    | 59.0491             | 0.0                         | 3.09                                                       | 11.46       | 13.75       | 16.69       | <b>17.55</b> |
| CH <sub>3</sub> NO <sub>2</sub> .H <sup>+</sup> | CH <sub>3</sub> NO <sub>2</sub>                                         | 62.0237                    | 62.0208             | -2.8                        | 0.02                                                       | 0.24        | 0.27        | <b>0.30</b> | <b>0.30</b>  |

|                                                  |                                   |         |         |       |      |      |      |      |             |
|--------------------------------------------------|-----------------------------------|---------|---------|-------|------|------|------|------|-------------|
| $\text{CH}_3\text{NO}_3\cdot\text{H}^+$          | $\text{CH}_3\text{ONO}_2$         | 78.0186 | 78.0069 | -11.7 | 0.01 | 0.04 | 0.05 | 0.06 | <b>0.07</b> |
| $\text{C}_3\text{H}_5\text{NO}_2\cdot\text{H}^+$ | $\text{C}_3\text{H}_5\text{NO}_2$ | 88.0393 | 88.0188 | -20.5 | n.d. | 0.03 | 0.05 | 0.07 | <b>0.09</b> |

\* the measured mass is taken for the experiment which presents the highest amount.

# not detected

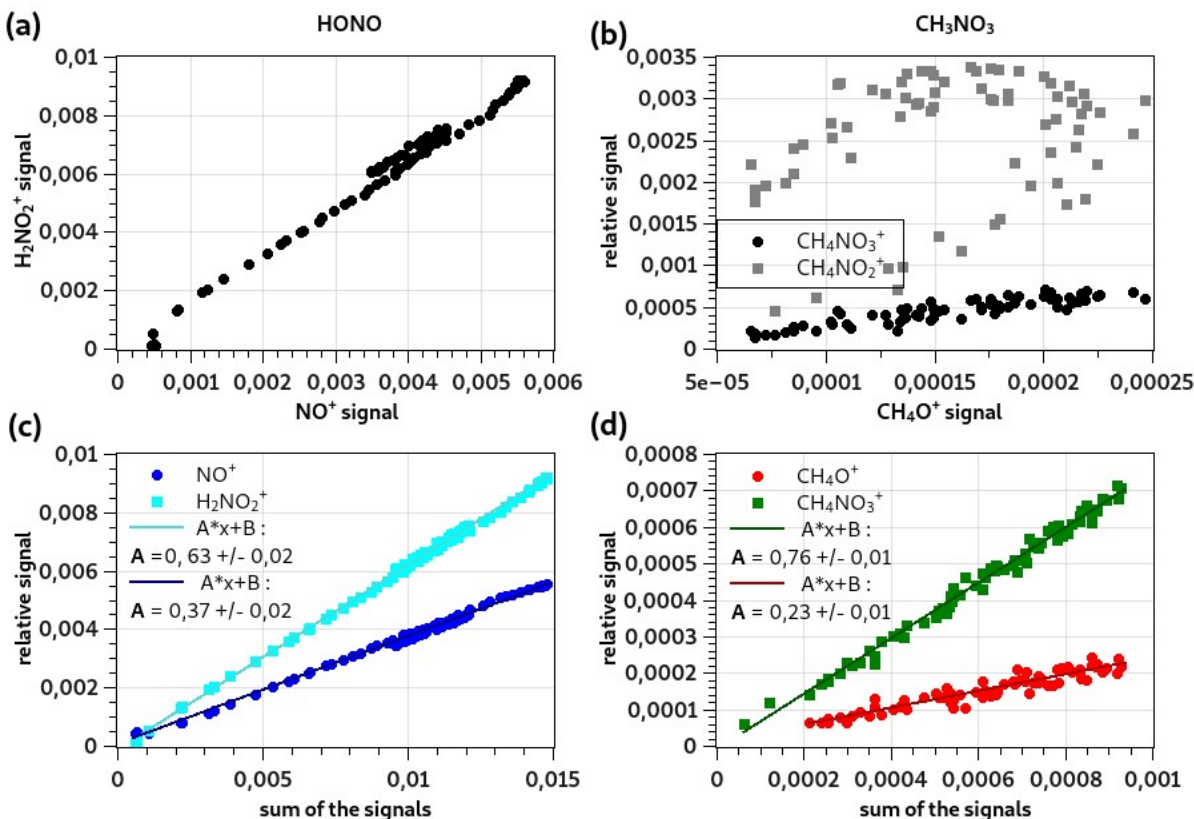

**Figure S1.** Ion fragments for HONO (a and c) and CH<sub>3</sub>NO<sub>3</sub> (b and d) protonation. The signals are taken from experiments at 3% and 5% oxygen so that height precision is correct.

Above: comparison of the relative ion signal for ion fragments (a) H<sub>2</sub>NO<sub>2</sub><sup>+</sup> versus NO<sup>+</sup> for HONO and (b) CH<sub>4</sub>NO<sub>3</sub><sup>+</sup> and CH<sub>4</sub>NO<sub>2</sub><sup>+</sup> versus CH<sub>4</sub>O<sup>+</sup> for CH<sub>3</sub>NO<sub>3</sub>. Linearity of the signals over all discharge numbers is characteristic of ions arising from a fragmentation of the same species. In (b), CH<sub>4</sub>NO<sub>2</sub><sup>+</sup> and CH<sub>4</sub>O<sup>+</sup> are then not related by a direct fragmentation process.

Below: branching ratio for (c) HONO protonation and (d) from CH<sub>3</sub>NO<sub>3</sub> protonation calculated from comparison of sum of the signal of fragment ions towards signal of fragment ions.

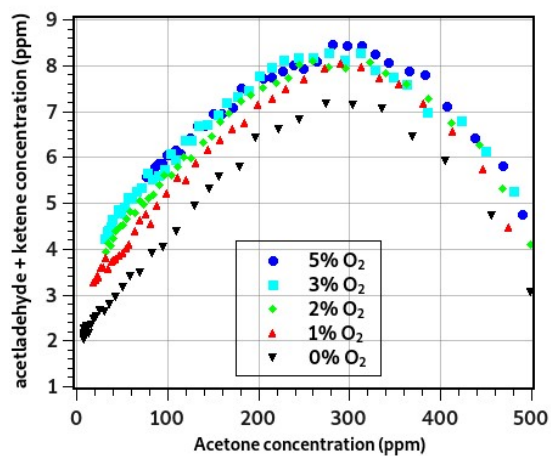

**Figure S2.** Evolution of the averaged concentrations of the sum of ketene and acetaldehyde compared to acetone concentration.

Ketene and acetaldehyde are supposed to be due to the same radical precursor  $\text{CH}_3\text{CO}$ . The behavior of the combined ketene+acetaldehyde is equivalent whatever oxygen concentration and only depends on acetone concentration.

**Annex 1.** Main kinetic processes involved in the production of formaldehyde (CH<sub>2</sub>O) and methanol (CH<sub>3</sub>OH), specific to mixtures containing oxygen, are described here, based on the exiting literature<sup>1</sup>. See also reactions (19)-(24) in the main text.

Kinetic processes for the production of formaldehyde

The main direct reaction for the production of CH<sub>2</sub>O is:

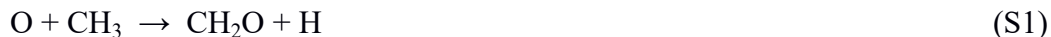

But several indirect paths should be also considered:

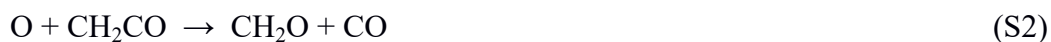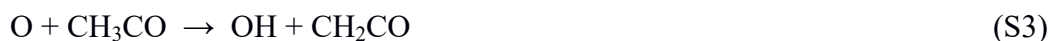

which is a source of the hydroxyl radical, followed by:

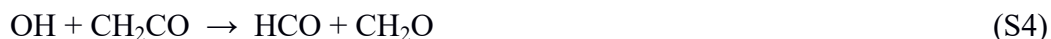

Most importantly at atmospheric pressure, the methyl group add to oxygen to form the methyl peroxy:

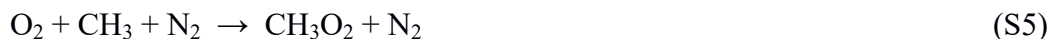

followed by:

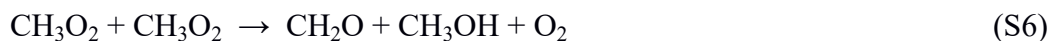

Also important is the formation of the radical CH<sub>3</sub>C(O)O<sub>2</sub>:

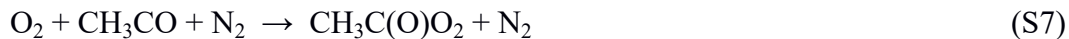

followed by:

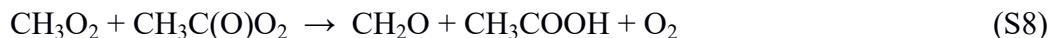

Other routes concern the methoxy radical, CH<sub>3</sub>O, produced by several reactions:

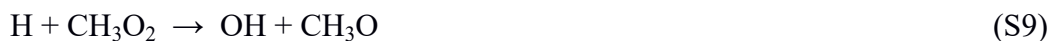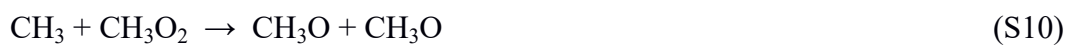

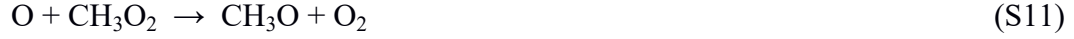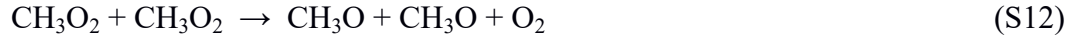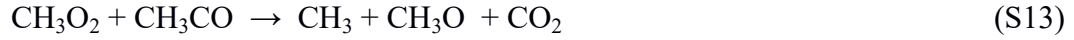

which is followed by:

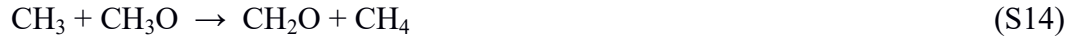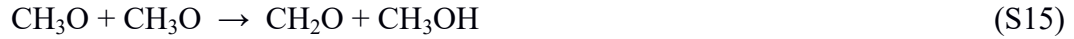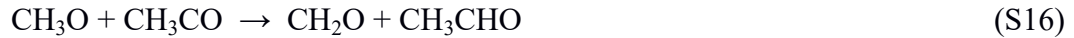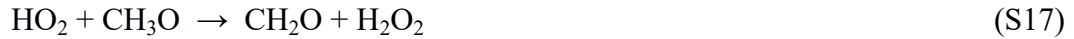

where the hydroperoxyl radical is readily produced by the three-body process:

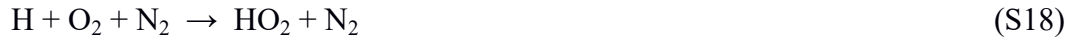

Kinetic processes for the production of methanol

Methanol is coming from (S6) and (S15), and more directly:

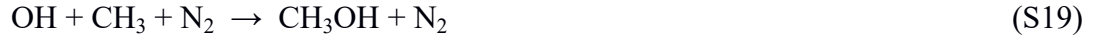

In addition, the following reactions should be considered:

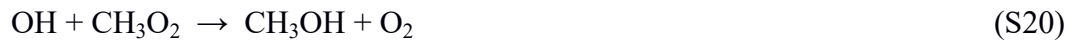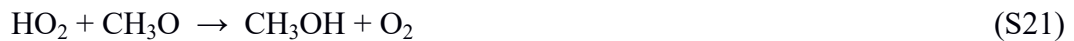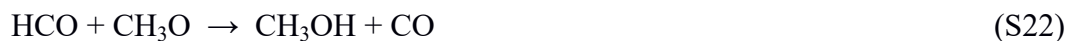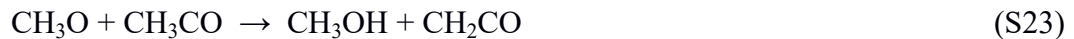

where the HCO radical can come from various reactions:

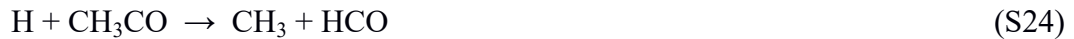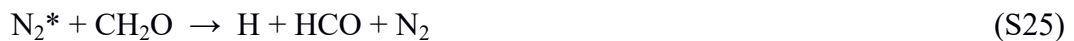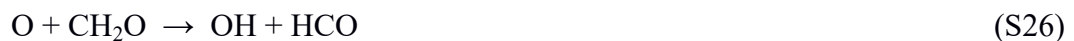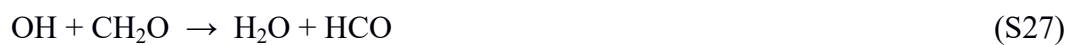

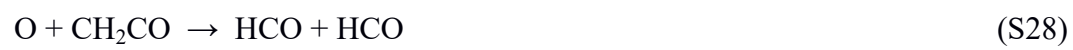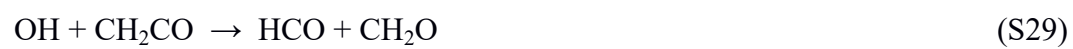

## REFERENCES

- (1) Manion, J. A.; Huie, R. E.; Levin, R. D.; Jr, D. R. B.; Orkin, V. L.; Tsang, W.; McGivern, W. S.; Hudgens, J. W.; Knyazev, V. D.; Atkinson, D. B.; Chai, E.; Tereza, A. M.; Lin, C.-Y.; T. C. Allison and, W. G. M.; Westley, F.; Herron, J. T.; Hampson, R. F.; D. H. Frizzell. NIST Chemical Kinetics Database. NIST Standard Reference Database 17, Version 7.0 (Web Version), Release 1.6.8, 2015.
- (2) Burkholder, J. B.; Sander, S. P.; Abbatt, J.; Barker, J. R.; Cappa, C.; Crouse, J. D.; Dibble, T. S.; Huie, R. E.; Kolb, C. E.; Kurylo, M. J.; Orkin, V. L.; Percival, C. J.; Wilmouth, D. M.; Wine, P. H. Chemical Kinetics and Photochemical Data for Use in Atmospheric Studies, Evaluation No. 19. *Jet Propulsion Laboratory, Pasadena* **2019**, 19 (5), 1610.
- (3) Kossyi, I. A.; Kostinsky, A. Y.; Matveyev, A. A.; Silakov, V. P. Kinetic Scheme of the Non-Equilibrium Discharge in Nitrogen-Oxygen Mixtures. *Plasma Sources Sci. Technol.* **1992**, 1 (3), 207–220. <https://doi.org/10.1088/0963-0252/1/3/011>.
- (4) Guerra, V.; Tejero-del-Caz, A.; Pintassilgo, C. D.; Alves, L. L. Modelling N<sub>2</sub>-O<sub>2</sub> Plasmas: Volume and Surface Kinetics. *Plasma Sources Sci. Technol.* **2019**, 28 (7), 073001. <https://doi.org/10.1088/1361-6595/ab252c>.
- (5) Magne, L.; Pasquiers, S.; Blin-Simiand, N.; Postel, C. Production and Reactivity of the Hydroxyl Radical in Homogeneous High Pressure Plasmas of Atmospheric Gases Containing Traces of Light Olefins. *J. Phys. D: Appl. Phys.* **2007**, 40 (10), 3112–3127. <https://doi.org/10.1088/0022-3727/40/10/015>.
- (6) Pasquiers, S.; Blin-Simiand, N.; Magne, L. Dissociation against Oxidation Kinetics for the Conversion of VOCs in Non-Thermal Plasmas of Atmospheric Gases. *Eur. Phys. J. Appl. Phys.* **2016**, 75 (2), 24703. <https://doi.org/10.1051/epjap/2016150575>.
- (7) Herron, J. T. Evaluated Chemical Kinetics Data for Reactions of N(2D), N(2P), and N<sub>2</sub>(A<sup>3</sup>Σ<sup>+</sup>) in the Gas Phase. *Journal of Physical and Chemical Reference Data* **1999**, 28 (5), 1453–1483. <https://doi.org/10.1063/1.556043>.
- (8) Faider, W.; Pasquiers, S.; Blin-Simiand, N.; Magne, L. Effect of Oxygen on the Conversion of Acetaldehyde in Homogeneous Plasmas of N<sub>2</sub>/O<sub>2</sub>/CH<sub>3</sub>CHO Mixtures. *Plasma Sources Sci. Technol.* **2013**, 22 (6), 065010. <https://doi.org/10.1088/0963-0252/22/6/065010>.
- (9) Hou, H.; Li, Y.; Wang, B. Computational Study of the Reaction of Atomic Oxygen with Acetone in the Gas Phase. *J. Phys. Chem. A* **2006**, 110 (49), 13163–13171. <https://doi.org/10.1021/jp065346w>.
- (10) Budge, S.; Roscoe, J. M. The Reactions of O(3P) with Acetonitrile and Propionitrile. *Can. J. Chem.* **1995**, 73 (5), 666–674. <https://doi.org/10.1139/v95-085>.
- (11) Tsang, W.; Herron, J. T. Chemical Kinetic Data Base for Propellant Combustion I. Reactions Involving NO, NO<sub>2</sub>, HNO, HNO<sub>2</sub>, HCN and N<sub>2</sub>O. *Journal of Physical and Chemical Reference Data* **1991**, 20 (4), 609–663. <https://doi.org/10.1063/1.555890>.
- (12) Harris, G. W.; Kleindienst, T. E.; Pitts, J. N. Rate Constants for the Reaction of OH Radicals with CH<sub>3</sub>CN, C<sub>2</sub>H<sub>5</sub>CN AND CH<sub>2</sub>=CH-CN in the Temperature Range 298–424 K. *Chemical Physics Letters* **1981**, 80 (3), 479–483. [https://doi.org/10.1016/0009-2614\(81\)85061-0](https://doi.org/10.1016/0009-2614(81)85061-0).
- (13) Cameron, M.; Sivakumaran, V.; Dillon, T. J.; Crowley, J. N. Reaction between OH and CH<sub>3</sub>CHO. *Phys. Chem. Chem. Phys.* **2002**, 4 (15), 3628–3638. <https://doi.org/10.1039/B202586H>.



- (14) Moreau, N.; Pasquiers, S.; Blin-Simiand, N.; Magne, L.; Jorand, F.; Postel, C.; Vacher, J.-R. Propane Dissociation in a Non-Thermal High-Pressure Nitrogen Plasma. *J. Phys. D: Appl. Phys.* **2010**, *43* (28), 285201. <https://doi.org/10.1088/0022-3727/43/28/285201>.
- (15) Koeta, O.; Blin-Simiand, N.; Faider, W.; Pasquiers, S.; Bary, A.; Jorand, F. Decomposition of Acetaldehyde in Atmospheric Pressure Filamentary Nitrogen Plasma. *Plasma Chem Plasma Process* **2012**, *32* (5), 991–1023. <https://doi.org/10.1007/s11090-012-9388-6>.
- (16) Tsai, C. Ping.; McFadden, D. L. Gas-Phase Atom-Radical Kinetics of Atomic Hydrogen, Nitrogen, and Oxygen Reactions with Fluoromethylene Radicals. *J. Phys. Chem.* **1990**, *94* (8), 3298–3300. <https://doi.org/10.1021/j100371a017>.
- (17) Marston, G.; Nesbitt, F. L.; Stief, L. J. Branching Ratios in the N+CH<sub>3</sub> Reaction: Formation of the Methylene Amidogen (H<sub>2</sub>CN) Radical. *J. Chem. Phys.* **1989**, *91* (6), 3483–3491. <https://doi.org/10.1063/1.456878>.
- (18) Cimas, A.; Largo, A. The Reaction of Nitrogen Atoms with Methyl Radicals: Are Spin-Forbidden Channels Important? *J. Phys. Chem. A* **2006**, *110* (37), 10912–10920. <https://doi.org/10.1021/jp0634959>.
- (19) Payne, W. A.; Monks, P. S.; Nesbitt, F. L.; Stief, L. J. The Reaction between N(4S) and C<sub>2</sub>H<sub>3</sub>: Rate Constant and Primary Reaction Channels. *J. Chem. Phys.* **1996**, *104* (24), 9808–9815. <https://doi.org/10.1063/1.471740>.
- (20) Baulch, D. L.; Cobos, C. J.; Cox, R. A.; Frank, P.; Hayman, G.; Just, Th.; Kerr, J. A.; Murrells, T.; Pilling, M. J.; Troe, J.; Walker, R. W.; Warnatz, J. Evaluated Kinetic Data for Combustion Modeling. Supplement I. *Journal of Physical and Chemical Reference Data* **1994**, *23* (6), 847–848. <https://doi.org/10.1063/1.555953>.
- (21) Delbos, E.; Devolder, P.; ElMaimouni, L.; Fittschen, C.; Brudnik, K.; Jodkowski, J. T.; Ratajczak, E. Pressure and Temperature Dependence of the Rate Constants for the Association Reactions of Vinyloxy and 1-Methylvinyloxy Radicals with Nitric Oxide. *Phys. Chem. Chem. Phys.* **2002**, *4* (13), 2941–2949. <https://doi.org/10.1039/B110100E>.
- (22) Srinivasan, N. K.; Su, M.-C.; Sutherland, J. W.; Michael, J. V. Reflected Shock Tube Studies of High-Temperature Rate Constants for OH + CH<sub>4</sub> → CH<sub>3</sub> + H<sub>2</sub>O and CH<sub>3</sub> + NO<sub>2</sub> → CH<sub>3</sub>O + NO. *J. Phys. Chem. A* **2005**, *109* (9), 1857–1863. <https://doi.org/10.1021/jp040679j>.
- (23) Gao, Y.; Macdonald, R. G. Determination of the Rate Constant for the Radical–Radical Reaction NCO(X<sup>2</sup>Π) + CH<sub>3</sub>(X<sup>2</sup>A<sub>2</sub>′) at 293 K and an Estimate of Possible Product Channels. *J. Phys. Chem. A* **2006**, *110* (3), 977–989. <https://doi.org/10.1021/jp058247b>.
- (24) Hassinen, E.; Riepponen, P.; Blomqvist, K.; Kalliorinne, K.; Evseev, A. M.; Koskikallio, J. Kinetics of Reactions between Methoxycarbonyl, Methyl, and Methoxy Radicals Formed in Flash Photolysis of Dimethyl Oxalate in Gas Phase. *International Journal of Chemical Kinetics* **1985**, *17* (10), 1125–1134. <https://doi.org/10.1002/kin.550171009>.
- (25) Tsang, W. Chemical Kinetic Data Base for Combustion Chemistry. Part 2. Methanol. *Journal of Physical and Chemical Reference Data* **1987**, *16* (3), 471–508. <https://doi.org/10.1063/1.555802>.
- (26) Lias, S. G.; Bartmess, J. E.; Liebman, J. F.; Holmes, J. L.; Levin, R. D.; Mallard, W. G. Ion Energetics Data. In *NIST Chemistry WebBook*; Lindstrom, P. J., Mallard, W. G., Eds.; NIST Standard Reference Database Number 69; Gaithersburg MD.
- (27) Su, T.; Chesnavich, W. J. Parametrization of the Ion–Polar Molecule Collision Rate Constant by Trajectory Calculations. *J. Chem. Phys.* **1982**, *76* (10), 5183–5185. <https://doi.org/10.1063/1.442828>.

- (28) Lindinger, W.; Hansel, A.; Jordan, A. On-Line Monitoring of Volatile Organic Compounds at Pptv Levels by Means of Proton-Transfer-Reaction Mass Spectrometry (PTR-MS) Medical Applications, Food Control and Environmental Research. *International Journal of Mass Spectrometry and Ion Processes* **1998**, *173* (3), 191–241. [https://doi.org/10.1016/S0168-1176\(97\)00281-4](https://doi.org/10.1016/S0168-1176(97)00281-4).
- (29) Spanel, P.; Ji, Y.; Smith, D. SIFT Studies of the Reactions of H<sub>3</sub>O<sup>+</sup>, NO<sup>+</sup> and O<sub>2</sub><sup>+</sup> with a Series of Aldehydes and Ketones. *Int. J. Mass Spectrom. Ion Proc.* **1997**, *165–166*, 25–37. [https://doi.org/10.1016/S0168-1176\(97\)00166-3](https://doi.org/10.1016/S0168-1176(97)00166-3).
- (30) Mackay, G. I.; Betowski, L. D.; Payzant, J. D.; Schiff, H. I.; Bohme, D. K. Rate Constants at 297.K for Proton-Transfer Reactions with Hydrocyanic Acid and Acetonitrile. Comparisons with Classical Theories and Exothermicity. *J. Phys. Chem.* **1976**, *80* (26), 2919–2922. <https://doi.org/10.1021/j100567a019>.
- (31) Tanaka, K.; Mackay, G. I.; Bohme, D. K. Rate and Equilibrium Constant Measurements for Gas-Phase Proton-Transfer Reactions Involving H<sub>2</sub>O, H<sub>2</sub>S, HCN, and H<sub>2</sub>CO. *Can. J. Chem.* **1978**, *56* (2), 193–204. <https://doi.org/10.1139/v78-031>.
- (32) Spanel, P.; Smith, D. SIFT Studies of the Reactions of H<sub>3</sub>O<sup>+</sup>, NO<sup>+</sup> and O<sub>2</sub><sup>+</sup> with a Series of Alcohols. *Int. J. Mass Spectrom. Ion Proc.* **1997**, *167–168*, 375–388. [https://doi.org/10.1016/S0168-1176\(97\)00085-2](https://doi.org/10.1016/S0168-1176(97)00085-2).
- (33) Mackay, G. I.; Tanner, S. D.; Hopkinson, A. C.; Bohme, D. K. Gas-Phase Proton-Transfer Reactions of the Hydronium Ion at 298 K. *Can. J. Chem.* **1979**, *57* (12), 1518–1523. <https://doi.org/10.1139/v79-248>.
- (34) Lee, A.; Goldstein, A. H.; Kroll, J. H.; Ng, N. L.; Varutbangkul, V.; Flagan, R. C.; Seinfeld, J. H. Gas-Phase Products and Secondary Aerosol Yields from the Photooxidation of 16 Different Terpenes. *Journal of Geophysical Research: Atmospheres* **2006**, *111* (D17). <https://doi.org/10.1029/2006JD007050>.
- (35) Metzger, A.; Dommen, J.; Gaeggeler, K.; Duplissy, J.; Prevot, A. S. H.; Kleffmann, J.; Elshorbany, Y.; Wisthaler, A.; Baltensperger, U. Evaluation of 1,3,5 Trimethylbenzene Degradation in the Detailed Tropospheric Chemistry Mechanism, MCMv3.1, Using Environmental Chamber Data. *Atmospheric Chemistry and Physics* **2008**, *8* (21), 6453–6468. <https://doi.org/10.5194/acp-8-6453-2008>.
- (36) Dey, A.; Fernando, R.; Abeysekera, C.; Homayoon, Z.; Bowman, J. M.; Suits, A. G. Photodissociation Dynamics of Nitromethane and Methyl Nitrite by Infrared Multiphoton Dissociation Imaging with Quasiclassical Trajectory Calculations: Signatures of the Roaming Pathway. *J. Chem. Phys.* **2014**, *140* (5), 054305. <https://doi.org/10.1063/1.4862691>.
- (37) Fehsenfeld, F. C.; Howard, C. J.; Schmeltekopf, A. L. Gas Phase Ion Chemistry of HNO<sub>3</sub>. *J. Chem. Phys.* **1975**, *63* (7), 2835–2841. <https://doi.org/10.1063/1.431722>.
- (38) Ivanova, E. V.; Muchall, H. M. Hydrolysis of N-Sulfinylamines and Isocyanates: A Computational Comparison. *J. Phys. Chem. A* **2007**, *111* (42), 10824–10833. <https://doi.org/10.1021/jp075210d>.
- (39) Miller, K. J.; Savchik, J. A New Empirical Method to Calculate Average Molecular Polarizabilities. *J. Am. Chem. Soc.* **1979**, *101* (24), 7206–7213. <https://doi.org/10.1021/ja00518a014>.
